# Supplementary material
Source: publisher site journal article supplement (https://www.dovepress.com/article/593782)
Supplement: Supplementary file 1 [file 593782_Supplementary%20Material%201.docx]

**Supplementary Material 1**

**STROBE Checklist for Observational Studies**

| **Section** | **Item** | **Recommendation** | **Location in manuscript** |
| --- | --- | --- | --- |
| Title and Abstract | 1 | Indicate the study design in the title or abstract | Title; Abstract |
| Background/Rationale | 2 | Explain the scientific background and rationale for the investigation | Introduction, page 3 |
| Objectives | 3 | State specific objectives, including prespecified hypotheses | Introduction, last paragraph |
| Study design | 4 | Present key elements of study design early in the paper | Methods – Study design |
| Setting | 5 | Describe the setting, locations, and relevant dates | Methods – Setting |
| Participants | 6 | Give eligibility criteria and sources/methods of participant selection | Methods – Participants |
| Variables | 7 | Clearly define outcomes, exposures, predictors, potential confounders | Methods – Variables |
| Data sources/measurement | 8 | Describe sources of data and assessment methods | Methods – Data sources and measurement |
| Bias | 9 | Describe efforts to address potential sources of bias | Methods – Bias |
| Study size | 10 | Explain how the study size was determined | Methods – Study size |
| Quantitative variables | 11 | Explain how quantitative variables were handled | Methods – Statistical methods |
| Statistical methods | 12 | Describe all statistical methods including those used to control for confounding | Methods – Statistical methods |
| Participants | 13 | Report numbers of individuals at each stage of the study | Results – Participants; Figure 2 |
| Descriptive data | 14 | Give characteristics of study participants | Results – Main results; Table 3 |
| Outcome data | 15 | Report numbers of outcome events | Results – Main results |
| Main results | 16 | Provide unadjusted estimates and measures of precision | Results – Tables 3 and 4 |
| Other analyses | 17 | Report other analyses done | Results – ROC analysis |
| Key results | 18 | Summarize key results with reference to study objectives | Discussion – first paragraph |
| Limitations | 19 | Discuss limitations of the study | Discussion – Limitations |
| Interpretation | 20 | Provide a cautious interpretation of results | Discussion |
| Generalisability | 21 | Discuss generalisability of the results | Discussion – Limitations and generalisability |
| Funding | 22 | Describe sources of funding and role of funders | Funding statement |
